# Supplementary material
Source: PubMed Central journal article supplement (PMC8136138)
Supplement: 12916_2021_2003_MOESM1_ESM.pdf [file 12916_2021_2003_MOESM1_ESM.pdf]

## Additional File 1. Sequelae, persistent symptomatology, and outcomes after COVID-19 hospitalization: the ANCOHVID multicentre 6-month follow-up study.

Álvaro Romero-Duarte, Mario Rivera-Izquierdo, Inmaculada Guerrero-Fernández de Alba, Marina Pérez-Contreras, Nicolás Francisco Fernández-Martínez, Rafael Ruiz-Montero, Álvaro Serrano-Ortiz, Rocío Ortiz González-Serna, Inmaculada Salcedo-Leal, Eladio Jiménez-Mejías,<sup>3,9</sup> Antonio Cárdenas-Cruz.

### STROBE Statement

Checklist of items included in reports of observational studies.

|                              | Item No | Recommendation                                                                                                                                                                                                                                                                                                                        |
|------------------------------|---------|---------------------------------------------------------------------------------------------------------------------------------------------------------------------------------------------------------------------------------------------------------------------------------------------------------------------------------------|
| <b>Title and abstract</b>    | 1       | (a) Indicate the study's design with a commonly used term in the title or the abstract. <b>Retrospective observational longitudinal (6-month follow-up) study (abstract).</b><br>(b) Provide in the abstract an informative and balanced summary of what was done and what was found. <b>Provided in the abstract.</b>                |
| <b>Introduction</b>          |         |                                                                                                                                                                                                                                                                                                                                       |
| Background/rationale         | 2       | Explain the scientific background and rationale for the investigation being reported. <b>Explained in the first 4 paragraphs of the introduction.</b>                                                                                                                                                                                 |
| Objectives                   | 3       | State specific objectives, including any prespecified hypotheses. <b>Stated in the last (fifth) paragraph of the introduction.</b>                                                                                                                                                                                                    |
| <b>Methods</b>               |         |                                                                                                                                                                                                                                                                                                                                       |
| Study design                 | 4       | Present key elements of study design early in the paper. <b>Presented at the beginning of the methods (study design and setting).</b>                                                                                                                                                                                                 |
| Setting                      | 5       | Describe the setting, locations, and relevant dates, including periods of recruitment, exposure, follow-up, and data collection. <b>Described at the beginning of the methods (study design and setting).</b>                                                                                                                         |
| Participants                 | 6       | Give the eligibility criteria, and the sources and methods of selection of participants. <b>Presented at the beginning of the methods (study design and setting).</b>                                                                                                                                                                 |
| Variables                    | 7       | Clearly define all outcomes, exposures, predictors, potential confounders, and effect modifiers. Give diagnostic criteria, if applicable. <b>We presented all the variables of the study in the "data source and variables" section. We indicated the exposure and outcome variables.</b>                                             |
| Data sources/<br>measurement | 8*      | For each variable of interest, give sources of data and details of methods of assessment (measurement). Describe comparability of assessment methods if there is more than one group. <b>We presented all the sources of the variables of the study in the "data source and variables" section and provided a full description in</b> |

**Additional File 2: Table S1. We also performed a dendrogram for cluster analysis (figure 1) in order to provide evidence of validity of the information collected.**

|                        |    |                                                                                                                                                                                                                                                                                                                                                                                                                                                                                                                                                                                                                                       |
|------------------------|----|---------------------------------------------------------------------------------------------------------------------------------------------------------------------------------------------------------------------------------------------------------------------------------------------------------------------------------------------------------------------------------------------------------------------------------------------------------------------------------------------------------------------------------------------------------------------------------------------------------------------------------------|
| Bias                   | 9  | Describe any efforts to address potential sources of bias. <b>Described in “statistical analyses” section.</b>                                                                                                                                                                                                                                                                                                                                                                                                                                                                                                                        |
| Study size             | 10 | Explain how the study size was arrived at. <b>Explained in the methods (a complete cohort of hospitalized patients during the period of recruitment).</b>                                                                                                                                                                                                                                                                                                                                                                                                                                                                             |
| Quantitative variables | 11 | Explain how quantitative variables were handled in the analyses. If applicable, describe which groupings were chosen and why. <b>Explained in the methods.</b>                                                                                                                                                                                                                                                                                                                                                                                                                                                                        |
| Statistical methods    | 12 | (a) Describe all statistical methods, including those used to control for confounding. <b>Described in “statistical analyses” section.</b><br>(b) Describe any methods used to examine subgroups and interactions. <b>Described in “statistical analyses” section.</b><br>(c) Explain how missing data were addressed. <b>Explained throughout the manuscript (two variables were not considered for presenting too many missing values: smoking habit and obesity).</b><br><br>If applicable, describe analytical methods taking account of sampling strategy. <b>N/A.</b><br><br>(e) Describe any sensitivity analyses. <b>N/A.</b> |

## **Results**

|                  |     |                                                                                                                                                                                                                                                                                                                                                                                                                                                                                                                                              |
|------------------|-----|----------------------------------------------------------------------------------------------------------------------------------------------------------------------------------------------------------------------------------------------------------------------------------------------------------------------------------------------------------------------------------------------------------------------------------------------------------------------------------------------------------------------------------------------|
| Participants     | 13* | (a) Report numbers of individuals at each stage of study—eg numbers potentially eligible, examined for eligibility, confirmed eligible, included in the study, completing follow-up, and analysed. <b>Explained in the first paragraph of the “Sociodemographic and clinical variables” section.</b><br><br>(b) Give reasons for non-participation at each stage. <b>We included all hospitalized patients during recruitment (non-participation is not applicable in this study).</b><br><br>(c) Consider use of a flow diagram. <b>N/A</b> |
| Descriptive data | 14* | (a) Give characteristics of study participants (eg demographic, clinical, social) and information on exposures and potential confounders. <b>Explained in the first paragraph of the “Sociodemographic and clinical variables” section and in Table 1.</b><br><br>(b) Indicate number of participants with missing data for each variable of interest. <b>Indicated in Table 1 (“Unknown”).</b>                                                                                                                                              |
| Outcome data     | 15* | <i>Cross-sectional study</i> —Report numbers of outcome events or summary measures. <b>Reported in Table 1 (columns).</b>                                                                                                                                                                                                                                                                                                                                                                                                                    |
| Main results     | 16  | (a) Give unadjusted estimates and, if applicable, confounder-adjusted estimates and their precision (eg, 95% confidence interval). Make clear which confounders were adjusted for and why they were included. <b>Given in Additional File 2: Tables S3 to S5.</b>                                                                                                                                                                                                                                                                            |

(b) Report category boundaries when continuous variables were categorized. **Reported in Table 1 (age).**

(c) If relevant, consider translating estimates of relative risk into absolute risk for a meaningful time period. **N/A**

---

|                |    |                                                                                                                                                                                                 |
|----------------|----|-------------------------------------------------------------------------------------------------------------------------------------------------------------------------------------------------|
| Other analyses | 17 | Report other analyses done—eg analyses of subgroups and interactions, and sensitivity analyses. <b>Reported in the “Frequency of SPS during the 6-month follow-up” and “Outcomes” sections.</b> |
|----------------|----|-------------------------------------------------------------------------------------------------------------------------------------------------------------------------------------------------|

---

#### **Discussion**

|             |    |                                                                                                                     |
|-------------|----|---------------------------------------------------------------------------------------------------------------------|
| Key results | 18 | Summarise key results with reference to study objectives. <b>Reported in the first paragraph of the Discussion.</b> |
|-------------|----|---------------------------------------------------------------------------------------------------------------------|

---

|             |    |                                                                                                                                                                                                                       |
|-------------|----|-----------------------------------------------------------------------------------------------------------------------------------------------------------------------------------------------------------------------|
| Limitations | 19 | Discuss limitations of the study, taking into account sources of potential bias or imprecision. Discuss both direction and magnitude of any potential bias. <b>Thoroughly reported in the Limitations subsection.</b> |
|-------------|----|-----------------------------------------------------------------------------------------------------------------------------------------------------------------------------------------------------------------------|

---

|                |    |                                                                                                                                                                                                                                                |
|----------------|----|------------------------------------------------------------------------------------------------------------------------------------------------------------------------------------------------------------------------------------------------|
| Interpretation | 20 | Give a cautious overall interpretation of results considering objectives, limitations, multiplicity of analyses, results from similar studies, and other relevant evidence. <b>Reported throughout the Discussion and Conclusion sections.</b> |
|----------------|----|------------------------------------------------------------------------------------------------------------------------------------------------------------------------------------------------------------------------------------------------|

---

|                  |    |                                                                                                                      |
|------------------|----|----------------------------------------------------------------------------------------------------------------------|
| Generalisability | 21 | Discuss the generalisability (external validity) of the study results. <b>Reported in the Limitations subsection</b> |
|------------------|----|----------------------------------------------------------------------------------------------------------------------|

---

#### **Other information**

|         |    |                                                                                                                                                                                                              |
|---------|----|--------------------------------------------------------------------------------------------------------------------------------------------------------------------------------------------------------------|
| Funding | 22 | Give the source of funding and the role of the funders for the present study and, if applicable, for the original study on which the present article is based. <b>Reported in the “Funding” declaration.</b> |
|---------|----|--------------------------------------------------------------------------------------------------------------------------------------------------------------------------------------------------------------|
