# Supplementary material
Source: PubMed Central journal article supplement (PMC8136138)
Supplement: 12916_2021_2003_MOESM2_ESM.pdf [file 12916_2021_2003_MOESM2_ESM.pdf]

## Additional File 2. Sequelae, persistent symptomatology, and outcomes after COVID-19 hospitalization: the ANCOHVID multicentre 6-month follow-up study.

Álvaro Romero-Duarte, Mario Rivera-Izquierdo, Inmaculada Guerrero-Fernández de Alba, Marina Pérez-Contreras, Nicolás Francisco Fernández-Martínez, Rafael Ruiz-Montero, Álvaro Serrano-Ortiz, Rocío Ortiz González-Serna, Inmaculada Salcedo-Leal, Eladio Jiménez-Mejías,<sup>3,9</sup> Antonio Cárdenas-Cruz.

**Table S1. Sequelae or persistent symptoms (SPS) during 6 months after discharge: description and definitions of the information collected.**

| Sequelae or persistent symptoms (SPS) | Definition                                                                                                                                                                         |
|---------------------------------------|------------------------------------------------------------------------------------------------------------------------------------------------------------------------------------|
| <b>Any SPS</b>                        | Any of the considered SPS were present at any point during the follow-up.                                                                                                          |
| <b>Any systemic/general SPS</b>       | Any of the following SPS were present at any point during the follow-up:                                                                                                           |
| Persistent fever                      | Temperature >38°C measured in Primary Care consultation or reported by the patient during the follow-up                                                                            |
| Fatigue*                              | Subjective sensation of physical tiredness.                                                                                                                                        |
| Muscle weakness*                      | Subjective sensation of lack of muscle strength.                                                                                                                                   |
| Musculoskeletal pain                  | Pain in any muscle or articulation not reported before COVID-19 hospitalization.                                                                                                   |
| General malaise                       | Subjective sensation of unhealthiness, discomfort or weakness that cannot be attributed to any specific condition.                                                                 |
| Edema                                 | Objective dimple sign in Primary Care consultation or increasing swelling reported by the patient                                                                                  |
| Pressure ulcers                       | Ulcers in sloping areas after prolonged bedtime, not present before COVID-19 hospitalization                                                                                       |
| <b>Any respiratory SPS</b>            | Any of the following SPS were present at any point during the follow-up:                                                                                                           |
| Dyspnea                               | Subjective sensation of difficult or labored breathing that was not present (or was less significant) before COVID-19 hospitalization                                              |
| Rib pain                              | Muscle or bone pain in the rib                                                                                                                                                     |
| Thoracic pain                         | Pain in the thoracic area                                                                                                                                                          |
| Persistent cough                      | Cough identified on inspection at Primary Care consultation or reported after discharge from COVID-19 that was not present or was less significant before COVID-19 hospitalization |
| Persistent pharyngeal symptoms        | Odynophagia, pharyngeal discomfort or sore throat that was not present before COVID-19 hospitalization                                                                             |
| <b>Any neurological SPS</b>           | Any of the following SPS were present at any point during the follow-up:                                                                                                           |
| ICU-related polyneuropathy            | Polyneuropathy associated with ICU hospitalization.                                                                                                                                |
| Headache                              | Any type of headache in patients that do not suffer from chronic headache (e.g., migraine)                                                                                         |
| Paresthesia                           | Subjective sensation of tingle or lack of sensitivity in any part of the body                                                                                                      |

|                                       |                                                                                                                                                                                  |
|---------------------------------------|----------------------------------------------------------------------------------------------------------------------------------------------------------------------------------|
| Movement disturbances                 | Shaking, tremor or dystonia that were not present before COVID-19 hospitalization                                                                                                |
| Disorientation or confusion           | Subjective sensation reported by the patient or caregiver of bouts of confusion                                                                                                  |
| Persistent anosmia or dysgeusia       | Anosmia or dysgeusia reported by the patient after discharge                                                                                                                     |
| <b>Any mental health SPS</b>          | Any of the following SPS were present at any point during the follow-up:                                                                                                         |
| Depressive symptoms*                  | Sadness, apathy, anodyne or hopelessness symptoms reported by the patient but not measured in quantitative scales                                                                |
| Anxiety symptoms*                     | Anxiety, restlessness or extreme fear reported by the patient but not measured in quantitative scales                                                                            |
| Sleep disturbances                    | Insomnia or lack of rest reported by the patient and not present before COVID-19 hospitalization                                                                                 |
| <b>Any hematological SPS</b>          | Disturbances in the blood count reported during follow-up consultations or presence of the following SPS:                                                                        |
| Thrombotic phenomena                  | Deep vein thrombosis, acute pulmonary embolism, stroke.                                                                                                                          |
| <b>Any dermatological SPS</b>         | Any of the following SPS were present at any point during the follow-up:                                                                                                         |
| Pruritus                              | Generalized itching or itching in specific parts of the body that was not present before COVID-19 hospitalization                                                                |
| Alopecia                              | Hair loss that was not present before COVID-19 hospitalization                                                                                                                   |
| Exanthema                             | Exanthema lesions or generalized skin rash that were not present before COVID-19 hospitalization                                                                                 |
| Eczema                                | Eczematous lesions or intertrigo that were not present before COVID-19 hospitalization                                                                                           |
| <b>Any nephrological SPS</b>          | Any of the following SPS were present at any point during the follow-up:                                                                                                         |
| Renal insufficiency <i>de novo</i>    | Analytical objective renal failure signs (urea, creatinine, etc.), that were not present or were less severe before COVID-19 hospitalization.                                    |
| <b>Any urological SPS*</b>            | Voiding syndrome symptoms reported by the patients (dysuria, nocturia, hematuria, etc.).                                                                                         |
| <b>Any endocrinological SPS</b>       | Any of the following SPS were present at any point during the follow-up:                                                                                                         |
| Uncontrolled glycemia                 | Objective measurement of glycemia out of normal parameters.                                                                                                                      |
| <b>Any otorhinolaryngological SPS</b> | Any of the following SPS were present at any point during the follow-up:                                                                                                         |
| Vertigo symptoms                      | Vertigo, rotatorydizziness or tinnitus that were not present before COVID-19 hospitalization                                                                                     |
| Otoacoustic symptoms                  | Hearing loss, otitis or otalgia that were not present before COVID-19 hospitalization                                                                                            |
| <b>Ophthalmological SPS</b>           | Loss of vision, diplopia or conjunctivitis that were not present before COVID-19 hospitalization                                                                                 |
| <b>Digestive symptoms*</b>            | Any of the following SPS were present at any point during the follow-up:                                                                                                         |
| Diarrhea*                             | Reported by patients or their caregivers.                                                                                                                                        |
| Constipation*                         | Reported by patients or their caregivers.                                                                                                                                        |
| Vomiting*                             | Reported by patients or their caregivers.                                                                                                                                        |
| Abdominal pain*                       | Pain in the abdominal area.                                                                                                                                                      |
| Anorexia*                             | Loss of appetite.                                                                                                                                                                |
| <b>Cardiovascular SPS</b>             | Any of the following SPS or cardiac insufficiency were present at any point during the follow-up:                                                                                |
| Hypotension or syncope                | Objective measurement of arterial pressure <90/60 or reported symptoms of syncope or frequent orthostatic hypotension not present or less severe before COVID-19 hospitalization |

|                            |                                                                                                                                                                               |
|----------------------------|-------------------------------------------------------------------------------------------------------------------------------------------------------------------------------|
| Arrhythmia or palpitations | Objective identification of arrhythmia in electrocardiographic test in consultation or reported symptoms of palpitations that was not present before COVID-19 hospitalization |
| <b>Superinfection</b>      | New infection by a pathogen different from SARS-CoV-2 after discharge:                                                                                                        |
| Urinary tract infection    | Pathogen detected in urinary culture                                                                                                                                          |
| Pneumonia                  | Pathogen detected in respiratory sample or sputum                                                                                                                             |
| Mycosis                    | Fungus identification (mostly <i>Candida albicans</i> )                                                                                                                       |

---

\*At discharge, most of the SPS were not present (e.g., no fever is a necessary criterion for discharge). However, the SPS that could be present at discharge and continue during follow-up are marked with an asterisk. The rest were not present at discharge and appeared abruptly during the follow-up of the study.

**Table S2. Sequelae or persistent symptoms (SPS) during 6 months after discharge associated to follow-up outcomes: return to emergency care, hospital readmission and post-discharge death.**

| <b>Sequelae or persistent symptoms (SPS)</b> | <b>Return to Emergency Services<br/>P-value</b> | <b>Hospital readmission<br/>P-value</b> | <b>Post-discharge death<br/>P-value</b> |
|----------------------------------------------|-------------------------------------------------|-----------------------------------------|-----------------------------------------|
| <b>Any SPS</b>                               | 0.004                                           | 0.301                                   | 0.224*                                  |
| <b>Any systemic/general SPS</b>              | 0.003                                           | 0.001                                   | 1.000*                                  |
| Persistent fever                             | <0.001                                          | <0.001                                  | 0.046                                   |
| Fatigue                                      | 0.649                                           | 0.787*                                  | 0.693*                                  |
| Muscle weakness                              | 0.178                                           | 0.628*                                  | 0.265*                                  |
| Musculoskeletal pain                         | 0.232                                           | 0.069*                                  | 0.109*                                  |
| General malaise                              | <0.001                                          | 0.092*                                  | 0.296*                                  |
| Edema                                        | 0.774                                           | 1.000*                                  | 0.210*                                  |
| Pressure ulcers                              | 0.012*                                          | 0.005*                                  | 0.008*                                  |
| <b>Any respiratory SPS</b>                   | 0.001                                           | 0.001                                   | 0.291                                   |
| Dyspnea                                      | 0.005                                           | 0.005                                   | 0.229                                   |
| Rib pain                                     | 0.214                                           | 1.000*                                  | 1.000*                                  |
| Thoracic pain                                | <0.001                                          | 0.563*                                  | 0.669*                                  |
| Persistent cough                             | 0.882                                           | 0.071                                   | 0.711*                                  |
| Persistent pharyngeal symptoms               | 0.900                                           | 0.704*                                  | 0.634*                                  |
| <b>Any neurological SPS</b>                  | 0.172                                           | 0.369                                   | 0.041                                   |
| ICU-related polyneuropathy                   | 0.969                                           | 1.000*                                  | 0.226*                                  |
| Headache                                     | 0.031                                           | 0.012*                                  | 0.012                                   |
| Paresthesia                                  | 0.028                                           | 0.371*                                  | 1.000*                                  |
| Movement disturbances                        | 0.220                                           | 0.390*                                  | 1.000*                                  |
| Disorientation or confusion                  | 0.132                                           | 0.005*                                  | 0.001*                                  |
| Persistent anosmia or dysgeusia              | 0.025                                           | 0.615*                                  | 0.657*                                  |
| <b>Any mental health SPS</b>                 | 0.042                                           | 0.030*                                  | 0.253*                                  |
| Depressive symptoms                          | 0.074                                           | 0.165*                                  | 0.303*                                  |
| Anxiety symptoms                             | 0.064                                           | 0.092*                                  | 1.000*                                  |
| Sleep disturbances                           | 0.096                                           | 0.044*                                  | 0.054*                                  |
| <b>Any hematological SPS</b>                 | 0.416                                           | 0.044*                                  | 0.303*                                  |
| Thrombotic phenomena                         | 0.331                                           | 0.009*                                  | <0.001                                  |
| <b>Any dermatological SPS</b>                | <0.001                                          | 0.755*                                  | 1.000*                                  |
| Pruritus                                     | 0.010*                                          | 0.606*                                  | 1.000*                                  |
| Alopecia                                     | 0.220                                           | 0.602*                                  | 1.000*                                  |
| Exanthema                                    | 0.041*                                          | 0.615*                                  | 1.000*                                  |
| Eczema                                       | 0.020*                                          | 0.635*                                  | 1.000*                                  |
| <b>Any nephrological SPS</b>                 | 0.016*                                          | <0.001*                                 | 0.004*                                  |
| Renal insufficiency <i>de novo</i>           | 0.005*                                          | 0.014*                                  | 1.000*                                  |
| <b>Any urological SPS</b>                    | 0.757                                           | 0.025*                                  | 0.004                                   |
| <b>Any endocrinological SPS</b>              | 0.020*                                          | 1.000*                                  | 1.000*                                  |
| Uncontrolled glycemia                        | 0.034*                                          | 1.000*                                  | 1.000*                                  |
| <b>Any otorhinolaryngological SPS</b>        | 0.605*                                          | 1.000*                                  | 0.226*                                  |
| Vertigo symptoms                             | 0.916*                                          | 1.000*                                  | 1.000*                                  |
| Otoacoustic symptoms                         | 0.397*                                          | 0.321*                                  | 0.096*                                  |
| <b>Ophthalmological SPS</b>                  | 0.144                                           | 1.000*                                  | 1.000*                                  |

|                                     |                   |                  |                |
|-------------------------------------|-------------------|------------------|----------------|
| <b>Digestive symptoms</b>           | 0.008             | 0.014*           | 0.622*         |
| Diarrhea                            | 0.331             | 0.013*           | 1.000*         |
| Constipation                        | 0.499*            | 0.006*           | 0.008*         |
| Vomiting                            | 1.000*            | 0.039*           | 1.000*         |
| Abdominal pain                      | 0.011             | 1.000*           | 1.000*         |
| Anorexia                            | 1.000*            | 0.227*           | 1.000*         |
| <b>Cardiovascular SPS</b>           | 0.153*            | 0.604*           | 0.201*         |
| Hypotension or syncope              | 0.033*            | 0.081*           | 0.020*         |
| Arrhythmia or palpitations          | 0.002*            | 0.135*           | 0.226*         |
| <b>Superinfection</b>               | 0.001             | <0.001           | 0.020*         |
| Urinary tract infection             | 0.437             | 0.059*           | 0.273*         |
| Pneumonia                           | 0.018*            | 0.014*           | 0.059*         |
| Mycosis                             | 1.000*            | 1.000*           | 1.000*         |
| <b>Return to Emergency Services</b> | -                 | <0.001           | 0.370*         |
| <b>Readmission to Hospital</b>      | <0.001            | -                | 0.002*         |
| <b>Death after discharge</b>        | 0.370*            | 0.002*           | -              |
| <b>Total</b>                        | <b>160 (20.3)</b> | <b>35 (12.1)</b> | <b>8 (1.0)</b> |

*ICU, intensive care unit. P-values are presented for chi-squared test, after checking the conditions of application. \* P-value of the Fisher exact test.*

**Table S3. Factors associated with the return to Emergency Services during the 6 months after discharge for COVID-19 hospitalization (n=160). Crude and adjusted logistic regression models.**

| Sequelae or persistent symptoms (SPS) | cOR               | aOR1              | aOR2              |
|---------------------------------------|-------------------|-------------------|-------------------|
| Women                                 | 1.04 (0.74-1.48)  |                   |                   |
| Age                                   | 0.94 (0.83-1.06)  |                   |                   |
| Polymedication                        | 1.38 (0.97-1.98)  | 1.80 (1.12-2.88)  |                   |
| Concomitant infection                 | 1.52 (0.94-2.45)  |                   |                   |
| Any SPS                               | 2.86 (1.88-4.37)  |                   |                   |
| Any systemic/general SPS              | 1.71 (1.20-2.44)  |                   |                   |
| Persistent fever                      | 3.03 (1.72-5.32)  | 2.23 (1.18-4.19)  | 2.23 (1.18-4.20)  |
| General malaise                       | 3.32 (1.65-6.68)  |                   |                   |
| Pressure ulcers                       | 4.06 (1.40-11.74) |                   |                   |
| Any respiratory SPS                   | 1.78 (1.26-2.53)  | 1.44 (1.00-2.14)  |                   |
| Dyspnea                               | 1.71 (1.18-2.47)  |                   |                   |
| Thoracic pain                         | 3.47 (1.95-6.18)  | 2.55 (1.33-4.90)  | 2.45 (1.26-4.77)  |
| Headache                              | 2.05 (1.06-4.00)  |                   |                   |
| Paresthesia                           | 2.40 (1.08-5.34)  |                   |                   |
| Persistent anosmia or dysgeusia       | 0.38 (0.14-0.91)  | 0.28 (0.10-0.74)  | 0.28 (0.10-0.74)  |
| Any mental health SPS                 | 1.64 (1.01-2.67)  |                   |                   |
| Any dermatological SPS                | 2.45 (1.46-4.11)  | 1.75 (1.01-3.03)  | 1.79 (1.03-3.11)  |
| Pruritus                              | 3.34 (1.36-8.21)  |                   |                   |
| Exanthema                             | 2.44 (1.05-5.67)  |                   |                   |
| Eczema                                | 4.04 (1.28-12.70) | 4.02 (1.16-13.92) | 3.97 (1.14-13.80) |
| Any nephrological SPS                 | 2.33 (1.15-4.70)  |                   |                   |
| Any endocrinological SPS              | 4.04 (1.28-12.70) |                   |                   |
| Glycemia uncontrol                    | 5.34 (1.18-24.11) |                   |                   |
| Any digestive symptoms                | 1.78 (1.16-2.73)  |                   |                   |
| Abdominal pain                        | 2.30 (1.19-4.44)  |                   |                   |
| Hypotension or syncope                | 2.61 (1.11-6.15)  |                   |                   |
| Arrhythmia or palpitations            | 3.79 (1.64-8.77)  | 3.08 (1.21-7.79)  | 3.09 (1.22-7.85)  |
| Superinfection                        | 2.54 (1.47-4.38)  | 1.90 (1.05-3.42)  | 1.79 (1.00-3.37)  |
| Pneumonia                             | 8.03 (1.47-44.21) | 7.65 (1.27-45.97) | 7.87 (1.30-47.52) |

*cOR, odds ratios of the association between each variable and the return to Emergency Services during the 6 months after discharge for COVID-19 hospitalization; aOR1, odds ratios of the multivariant logistic regression models adjusted for all the variables of each category (sociodemographic, SPS, etc.); aOR2, odds ratios of the multivariant logistic regression models adjusted for all the considered variables of the database.*

**Table S4. Factors associated with hospital readmission during the 6 months after discharge for COVID-19 first hospitalization (n=35). Crude and adjusted logistic regression models.**

| <b>Sequelae or persistent symptoms (SPS)</b>            | <b>cOR</b>          | <b>aOR</b>         |
|---------------------------------------------------------|---------------------|--------------------|
| <b>Sociodemographic and clinical data on admission:</b> |                     |                    |
| Women                                                   | 1.55 (0.76-3.16)    |                    |
| Age                                                     | 1.42 (1.09-1.85)    |                    |
| Previous chronic kidney disease                         | 2.67 (0.90-7.86)    |                    |
| Previous cardiovascular disease                         | 2.25 (1.06-4.76)    |                    |
| Polymedication                                          | 2.75 (1.31-5.79)    |                    |
| Dependency                                              | 5.46 (2.49-11.96)   |                    |
| Not living in domicile                                  | 5.69 (2.42-13.36)   |                    |
| Normal TR at admission                                  | 3.23 (1.35-7.70)    |                    |
| Normal TR at discharge                                  | 3.97 (1.31-12.04)   |                    |
| Concomitant infection                                   | 3.31 (1.36-8.06)    | 7.68 (1.52-38.8)   |
| CURB-65                                                 | 2.04 (1.26-3.28)    |                    |
| <b>Treatment during hospitalization:</b>                |                     |                    |
| Hydroxychloroquine                                      | 0.27 (0.10-0.71)    |                    |
| Lopinavir/ritonavir                                     | 2.13 (1.00-4.52)    |                    |
| Tocilizumab                                             | 2.84 (1.04-7.79)    | 3.68 (1.18-11.49)  |
| <b>SPS:</b>                                             |                     |                    |
| Any systemic/general SPS                                | 3.23 (1.57-6.64)    |                    |
| Persistent fever                                        | 11.23 (4.33-29.14)  | 8.31 (2.31-29.89)  |
| Musculoskeletal pain                                    | 2.52 (0.99-6.41)    |                    |
| General malaise                                         | 2.89 (0.86-9.54)    |                    |
| Pressure ulcers                                         | 10.84 (2.32-50.70)  |                    |
| Any respiratory SPS                                     | 3.22 (1.56-6.66)    |                    |
| Dyspnea                                                 | 2.80 (1.33-5.90)    |                    |
| Persistent cough                                        | 2.30 (0.91-5.80)    |                    |
| Headache                                                | 5.15 (1.58-16.74)   |                    |
| Disorientation or confusion                             | 10.84 (2.32-50.70)  |                    |
| Any mental health SPS                                   | 2.94 (1.14-7.56)    |                    |
| Sleep disturbances                                      | 3.98 (1.13-14.00)   |                    |
| Any hematological SPS                                   | 3.98 (1.13-14.00)   |                    |
| Thrombotic phenomena                                    | 8.10 (1.93-34.01)   |                    |
| Any nephrological SPS                                   | 14.81 (4.53-48.49)  | 6.49 (1.50-28.14)  |
| Renal insufficiency <i>de novo</i>                      | 11.86 (1.91-73.68)  |                    |
| Any urological SPS                                      | 7.88 (1.52-40.68)   |                    |
| Digestive symptoms                                      | 3.05 (1.29-7.20)    |                    |
| Diarrhea                                                | 4.19 (1.46-12.00)   |                    |
| Constipation                                            | 23.81 (2.40-235.82) |                    |
| Vomit                                                   | 15.39 (1.36-174.46) |                    |
| Hypotension or syncope                                  | 3.89 (0.93-16.32)   |                    |
| Superinfection                                          | 8.10 (3.18-20.63)   | 3.14 (1.05-9.40)   |
| Urinary tract infection                                 | 4.69 (1.07-20.55)   |                    |
| Pneumonia                                               | 11.86 (1.91-73.68)  | 11.81 (1.40-99.39) |

*TR, thoracic radiography; cOR, odds ratios of the association between each variable and the readmission to hospitalization during the 6 months after discharge for COVID-19 first hospitalization; aOR, odds ratios of the multivariate logistic regression models adjusted for all the variables of each category, including sex and age for all the models.*

**Table S5. Factors associated with mortality during the 6 months after discharge for COVID-19 hospitalization (n=8). Crude and adjusted logistic regression models.**

| <b>Sequelae or persistent symptoms (SPS)</b>            | <b>cOR</b>          | <b>aOR</b>          |
|---------------------------------------------------------|---------------------|---------------------|
| <b>Sociodemographic and clinical data on admission:</b> |                     |                     |
| Women                                                   | 1.95 (0.46-8.20)    |                     |
| Age                                                     | 3.62 (1.72-7.59)    | 3.57 (1.69-7.54)    |
| Previous chronic kidney disease                         | 6.57 (1.54-28.11)   |                     |
| Polymedication                                          | 4.99 (1.00-24.90)   |                     |
| Dependency                                              | 9.74 (2.30-41.31)   |                     |
| Living in residential centers                           | 5.24 (1.23-22.32)   |                     |
| Not candidate to CPR                                    | 16.4 (1.90-141.86)  |                     |
| <b>Treatment during hospitalization:</b>                |                     |                     |
| Hydroxychloroquine                                      | 0.15 (0.04-0.64)    |                     |
| Lopinavir/ritonavir                                     | 0.08 (0.01-0.63)    |                     |
| Azithromycin                                            | 0.25 (0.06-1.03)    |                     |
| <b>SPS:</b>                                             |                     |                     |
| Persistent fever                                        | 4.54 (0.89-23.02)   |                     |
| Pressure ulcers                                         | 21.6 (3.95-118.01)  | 9.27 (1.49-57.65)   |
| Any neurological SPS                                    | 3.87 (0.96-15.64)   | 4.82 (1.13-20.60)   |
| Headache                                                | 6.24 (1.22-31.91)   | 14.32 (2.17-94.59)  |
| Disorientation or confusion                             | 25.7 (5.7-115.84)   | 8.58 (1.77-41.69)   |
| Sleep disturbances                                      | 6.77 (1.32-34.72)   |                     |
| Any hematological SPS                                   | 3.17 (0.38-26.51)   |                     |
| Thrombotic phenomena                                    | 11.10 (2.13-57.99)  | 20.96 (2.98-147.54) |
| Any nephrological SPS                                   | 13.75 (3.15-59.97)  | 6.02 (1.25-28.95)   |
| Any urological SPS                                      | 7.89 (1.53-40.61)   | 6.09 (1.10-33.61)   |
| Otoacoustic symptoms                                    | 12.38 (1.38-111.28) | 10.90 (1.00-118.47) |
| Constipation                                            | 21.58 (3.95-118.00) | 15.32 (2.25-104.29) |
| Hypotension or syncope                                  | 12.19 (2.32-63.98)  | 8.52 (1.40-51.73)   |
| Any superinfection                                      | 7.29 (1.70-31.25)   |                     |
| Pneumonia                                               | 22.40 (2.31-217.32) | 28.55 (2.30-354.48) |

*cOR, odds ratios of the association between each variable and the readmission to hospitalization during the 6 months after discharge for COVID-19 first hospitalization; aOR, odds ratios of the multivariant logistic regression models adjusted for sex and age.*
